# Supplementary material
Source: PubMed Central journal article supplement (PMC4968282)
Supplement: Supp_Figure1.pdf [file Supp_Figure1.pdf]

## Supplementary Data

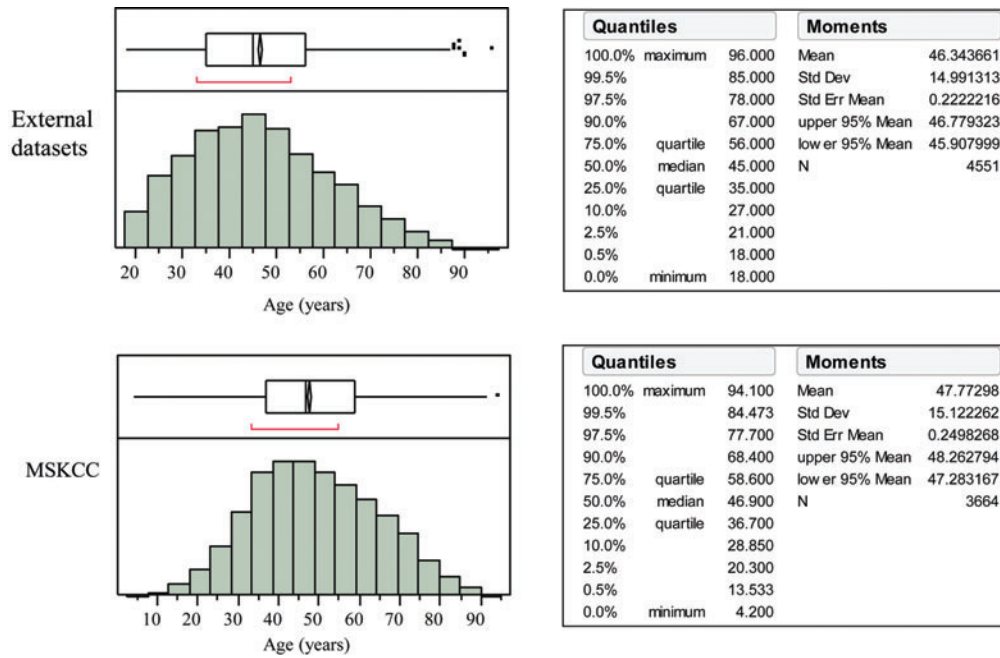

**SUPPLEMENTARY FIG. S1.** Distribution of age of patients with DTC in internal MSKCC cohort ( $n=3664$ ) and external cohort ( $n=4551$ ). MSKCC, Memorial Sloan Kettering Cancer Center.
