# Supplementary material
Source: PubMed Central journal article supplement (PMC4968282)
Supplement: Supp_Figure2.pdf [file Supp_Figure2.pdf]

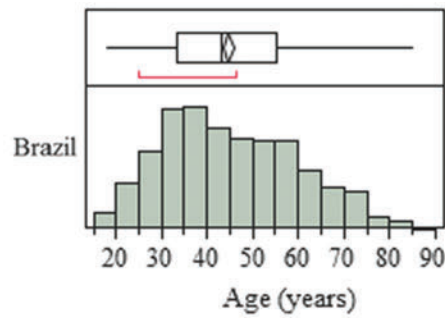

| Quantiles |                 | Moments        |           |
|-----------|-----------------|----------------|-----------|
| 100.0%    | maximum 85.000  | Mean           | 44.713622 |
| 99.5%     | 82.000          | Std Dev        | 14.662703 |
| 97.5%     | 74.000          | Std Err Mean   | 0.5778406 |
| 90.0%     | 65.000          | upper 95% Mean | 45.848293 |
| 75.0%     | quartile 55.250 | lower 95% Mean | 43.572946 |
| 50.0%     | median 43.000   | N              | 646       |
| 25.0%     | quartile 33.000 |                |           |
| 10.0%     | 26.000          |                |           |
| 2.5%      | 20.000          |                |           |
| 0.5%      | 18.000          |                |           |
| 0.0%      | minimum 18.000  |                |           |

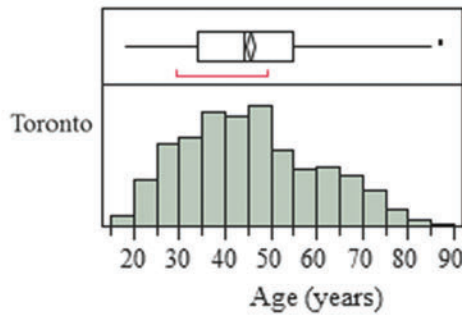

| Quantiles |                 | Moments        |           |
|-----------|-----------------|----------------|-----------|
| 100.0%    | maximum 87.000  | Mean           | 45.428108 |
| 99.5%     | 85.000          | Std Dev        | 15.135123 |
| 97.5%     | 77.000          | Std Err Mean   | 0.4576398 |
| 90.0%     | 67.400          | upper 95% Mean | 46.404743 |
| 75.0%     | quartile 55.000 | lower 95% Mean | 44.451473 |
| 50.0%     | median 44.000   | N              | 925       |
| 25.0%     | quartile 34.000 |                |           |
| 10.0%     | 26.000          |                |           |
| 2.5%      | 21.000          |                |           |
| 0.5%      | 18.000          |                |           |
| 0.0%      | minimum 18.000  |                |           |

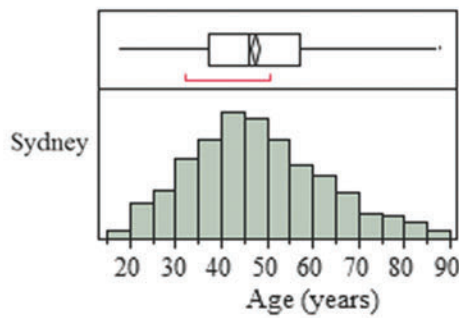

| Quantiles |                 | Moments        |           |
|-----------|-----------------|----------------|-----------|
| 100.0%    | maximum 83.000  | Mean           | 47.410097 |
| 99.5%     | 80.000          | Std Dev        | 14.750319 |
| 97.5%     | 80.000          | Std Err Mean   | 0.4369896 |
| 90.0%     | 63.000          | upper 95% Mean | 48.271426 |
| 75.0%     | quartile 57.000 | lower 95% Mean | 46.548769 |
| 50.0%     | median 46.000   | N              | 1129      |
| 25.0%     | quartile 37.000 |                |           |
| 10.0%     | 29.000          |                |           |
| 2.5%      | 22.000          |                |           |
| 0.5%      | 19.000          |                |           |
| 0.0%      | minimum 18.000  |                |           |

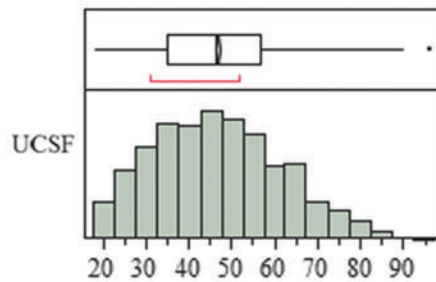

| Quantiles |                 | Moments        |           |
|-----------|-----------------|----------------|-----------|
| 100.0%    | maximum 95.000  | Mean           | 46.719611 |
| 99.5%     | 85.740          | Std Dev        | 15.108928 |
| 97.5%     | 73.000          | Std Err Mean   | 0.3511805 |
| 90.0%     | 67.000          | upper 95% Mean | 47.408363 |
| 75.0%     | quartile 57.000 | lower 95% Mean | 46.030359 |
| 50.0%     | median 46.000   | N              | 1851      |
| 25.0%     | quartile 35.000 |                |           |
| 10.0%     | 27.000          |                |           |
| 2.5%      | 21.000          |                |           |
| 0.5%      | 18.000          |                |           |
| 0.0%      | minimum 18.000  |                |           |

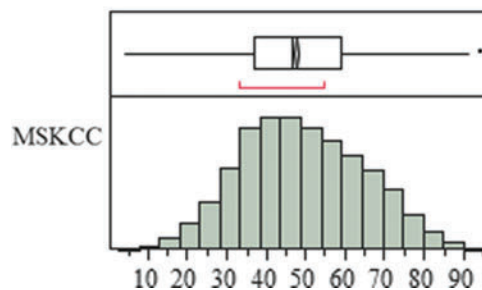

| Quantiles |                 | Moments        |           |
|-----------|-----------------|----------------|-----------|
| 100.0%    | maximum 94.100  | Mean           | 47.77298  |
| 99.5%     | 84.473          | Std Dev        | 15.122652 |
| 97.5%     | 77.700          | Std Err Mean   | 0.2488268 |
| 90.0%     | 68.400          | upper 95% Mean | 48.262794 |
| 75.0%     | quartile 58.600 | lower 95% Mean | 47.283167 |
| 50.0%     | median 46.900   | N              | 3664      |
| 25.0%     | quartile 36.700 |                |           |
| 10.0%     | 28.850          |                |           |
| 2.5%      | 20.300          |                |           |
| 0.5%      | 13.533          |                |           |
| 0.0%      | minimum 4.200   |                |           |

**SUPPLEMENTARY FIG. S2.** Distribution of age of patients with DTC in each cohort. UCSF, University of California–San Francisco.
